# Supplementary material for: Citizen Science: The First Peninsular Malaysia Butterfly Count
Source: Biodivers Data J. 2015 Dec 11;(3):e7159. doi: 10.3897/BDJ.3.e7159 (PMC4700385; doi:10.3897/BDJ.3.e7159)
Supplement: Supplementary material 3 — Butterfly Count Raw Data [file biodiversity_data_journal-3-e7159-s003.xlsx]

## Sheet: SpecimenData
Sample ID	Family	Genus	Species	Field identification	Collectors	Collection Date	Country/Ocean	State/Province	Exact Site	Lat	Lon	Elev
Count_140	Nymphalidae	Acraea	Acraea violae		See Sow Pang	06-Jun-2015	Malaysia	Malacca	No 7, Jalan K/P 37, Taman Krubong Perdana, 75260, Melaka.	2.32757	102.244	32
Count_174	Nymphalidae	Acraea	Acraea violae		lee see mun	06-Jun-2015	Malaysia	Negeri Sembilan	City park, seremban 2	2.68758	101.913	75
Count_194	Nymphalidae	Acraea	Acraea violae		NG SAY CHONG	06-Jun-2015	Malaysia	Federal Territory of Kuala Lumpur	Aman Puri	3.21097	101.613	106
Count_196	Nymphalidae	Acraea	Acraea violae		NG SAY CHONG	06-Jun-2015	Malaysia	Federal Territory of Kuala Lumpur	Aman Puri	3.21097	101.613	106
Count_201	Nymphalidae	Acraea	Acraea violae		NG SAY CHONG	06-Jun-2015	Malaysia	Federal Territory of Kuala Lumpur	Aman Puri	3.21097	101.613	106
Count_203	Nymphalidae	Acraea	Acraea violae		NG SAY CHONG	06-Jun-2015	Malaysia	Federal Territory of Kuala Lumpur	Aman Puri	3.21097	101.613	106
Count_213	Nymphalidae	Acraea	Acraea violae		Narong Jaturas	30-Jun-2015	Malaysia	Federal Territory of Kuala Lumpur	University of Malaya	3.1217	101.653	40
Count_46	Nymphalidae	Acraea	Acraea violae	Nymphalidae	Gerald Lee Zheng Yang	06-Jun-2015	Malaysia	Selangor	Bandar Sungai Long	3.0418	101.793	62
Count_86	Nymphalidae	Acraea	Acraea violae		Mr Ong	06-Jun-2015	Malaysia	Federal Territory of Kuala Lumpur	No 16, Jalan Aminuddin Baki, Tmn Tun Dr Ismail, 60000, Federal Territory of Kuala Lumpur.	3.15146	101.618	50
Count_92	Nymphalidae	Acraea	Acraea violae		Mr Ong	06-Jun-2015	Malaysia	Federal Territory of Kuala Lumpur	No 16, Jalan Aminuddin Baki, Tmn Tun Dr Ismail, 60000, Federal Territory of Kuala Lumpur.	3.15146	101.618	50
Count_166	Nymphalidae	Amathusia	Amathusia phidippus		Leong sum yee	06-Jun-2015	Malaysia	Selangor	bandar bukit puchong 2	2.97665	101.623	43
Count_12	Pieridae	Appias	Appias olferna	Nymphalidae	Ng Zhi Yu	06-Jun-2015	Malaysia	Johor	kulai,indahpura	1.64402	103.606	39
Count_125	Pieridae	Appias	Appias olferna	Nymphalidae	Chong Yen Chin	06-Jun-2015	Malaysia	Federal Territory of Kuala Lumpur	Jalan 13 Salak South Baru	3.086	101.71	66
Count_127	Pieridae	Appias	Appias olferna	Nymphalidae	Chong Yen Chin	06-Jun-2015	Malaysia	Federal Territory of Kuala Lumpur	Jalan 13 Salak South Baru	3.086	101.71	66
Count_143	Pieridae	Appias	Appias olferna		See Sow Pang	06-Jun-2015	Malaysia	Malacca	No 7, Jalan K/P 37, Taman Krubong Perdana, 75260, Melaka.	2.32757	102.244	32
Count_156	Pieridae	Appias	Appias olferna		Huwa Yean Yin	06-Jun-2015	Malaysia	Malacca	Hutan rekreasi Ayer Keroh	2.2807	102.301	58
Count_176	Pieridae	Appias	Appias olferna		lee see mun	06-Jun-2015	Malaysia	Negeri Sembilan	City park, seremban 2	2.68758	101.913	75
Count_177	Pieridae	Appias	Appias olferna		lee see mun	06-Jun-2015	Malaysia	Negeri Sembilan	City park, seremban 2	2.68758	101.913	75
Count_178	Pieridae	Appias	Appias olferna		lee see mun	06-Jun-2015	Malaysia	Negeri Sembilan	City park, seremban 2	2.68758	101.913	75
Count_180	Pieridae	Appias	Appias olferna		lee see mun	06-Jun-2015	Malaysia	Negeri Sembilan	City park, seremban 2	2.68758	101.913	75
Count_184	Pieridae	Appias	Appias olferna		innes lee jia hui	06-Jun-2015	Malaysia	Negeri Sembilan	city park	2.68758	101.913	75
Count_185	Pieridae	Appias	Appias olferna		innes lee jia hui	06-Jun-2015	Malaysia	Negeri Sembilan	city park	2.68758	101.913	75
Count_186	Pieridae	Appias	Appias olferna		innes lee jia hui	06-Jun-2015	Malaysia	Negeri Sembilan	city park	2.68758	101.913	75
Count_195	Pieridae	Appias	Appias olferna		NG SAY CHONG	06-Jun-2015	Malaysia	Federal Territory of Kuala Lumpur	Aman Puri	3.21097	101.613	106
Count_198	Pieridae	Appias	Appias olferna		NG SAY CHONG	06-Jun-2015	Malaysia	Federal Territory of Kuala Lumpur	Aman Puri	3.21097	101.613	106
Count_199	Pieridae	Appias	Appias olferna		NG SAY CHONG	06-Jun-2015	Malaysia	Federal Territory of Kuala Lumpur	Aman Puri	3.21097	101.613	106
Count_200	Pieridae	Appias	Appias olferna		NG SAY CHONG	06-Jun-2015	Malaysia	Federal Territory of Kuala Lumpur	Aman Puri	3.21097	101.613	106
Count_204	Pieridae	Appias	Appias olferna		innes lee jia hui	06-Jun-2015	Malaysia	Negeri Sembilan	city park	2.68758	101.913	75
Count_26	Pieridae	Appias	Appias olferna	Lycaenidae	Nurzuhaila binti Jamaludin	06-Jun-2015	Malaysia	Selangor	No 32, Jalan 3/58, Seksyen 3, Bandar Baru Bangi 43650 Selangor	2.93932	101.778	29
Count_28	Pieridae	Appias	Appias olferna	Pieridae	Nurzuhaila binti Jamaludin	06-Jun-2015	Malaysia	Selangor	No 32, Jalan 3/58, Seksyen 3, Bandar Baru Bangi 43650 Selangor	2.93932	101.778	29
Count_30	Pieridae	Appias	Appias olferna	MOTH	Nurzuhaila binti Jamaludin	06-Jun-2015	Malaysia	Selangor	No 32, Jalan 3/58, Seksyen 3, Bandar Baru Bangi 43650 Selangor	2.93932	101.778	29
Count_48	Pieridae	Appias	Appias olferna		NG MEI ENG	06-Jun-2015	Malaysia	Selangor	TAMAN SELATAN, KLANG	3.02986	101.442	9
Count_62	Pieridae	Appias	Appias olferna	Pieridae	MUNA NAJIHAH BINTI HJ. MOKHTARRUDDIN	06-Jun-2015	Malaysia	Federal Territory of Kuala Lumpur	KK12 Lake side	3.12568	101.661	37
Count_80	Pieridae	Appias	Appias olferna	Pieridae	Noraina binti Jamal Rashid	06-Jun-2015	Malaysia	Selangor	Teras Jernang	2.92252	101.758	25
Count_82	Pieridae	Appias	Appias olferna	Nymphalidae	Noraina binti Jamal Rashid	06-Jun-2015	Malaysia	Selangor	Teras Jernang	2.92252	101.758	25
Count_83	Pieridae	Appias	Appias olferna		Mr Ong	06-Jun-2015	Malaysia	Federal Territory of Kuala Lumpur	No 16, Jalan Aminuddin Baki, Tmn Tun Dr Ismail, 60000, Federal Territory of Kuala Lumpur.	3.15146	101.618	50
Count_153	Nymphalidae	Athyma	Athyma perius		Huwa Yean Yin	06-Jun-2015	Malaysia	Malacca	Hutan rekreasi Ayer Keroh	2.2807	102.301	58
Count_154	Nymphalidae	Athyma	Athyma perius		Huwa Yean Yin	06-Jun-2015	Malaysia	Malacca	Hutan rekreasi Ayer Keroh	2.2807	102.301	58
Count_155	Nymphalidae	Athyma	Athyma perius		Huwa Yean Yin	06-Jun-2015	Malaysia	Malacca	Hutan rekreasi Ayer Keroh	2.2807	102.301	58
Count_71	Hesperiidae	Borbo	Borbo cinnara	Hesperiidae	MUNA NAJIHAH BINTI HJ. MOKHTARRUDDIN	06-Jun-2015	Malaysia	Federal Territory of Kuala Lumpur	KK12 Lake side	3.12568	101.661	37
Count_45	Pieridae	Catopsilia	Catopsilia pomona	Pieridae	Gerald Lee Zheng Yang	06-Jun-2015	Malaysia	Selangor	Bandar Sungai Long	3.0418	101.793	62
Count_141	Pieridae	Catopsilia	Catopsilia pyranthe		See Sow Pang	06-Jun-2015	Malaysia	Malacca	No 7, Jalan K/P 37, Taman Krubong Perdana, 75260, Melaka.	2.32757	102.244	32
Count_148	Pieridae	Catopsilia	Catopsilia scylla		See Sow Pang	06-Jun-2015	Malaysia	Malacca	No 7, Jalan K/P 37, Taman Krubong Perdana, 75260, Melaka.	2.32757	102.244	32
Count_59	Pieridae	Catopsilia	Catopsilia scylla	Pieridae	MUNA NAJIHAH BINTI HJ. MOKHTARRUDDIN	06-Jun-2015	Malaysia	Federal Territory of Kuala Lumpur	KK12 Lake side	3.12568	101.661	37
Count_130	Lycaenidae	Cheritra	Cheritra freja	Nymphalidae	Joyce Lean	06-Jun-2015	Malaysia	Federal Territory of Kuala Lumpur	TTDI Kiara Park	3.15616	101.626	66
Count_1	Lycaenidae	Chilades	Chilades pandava	Lycaenidae	Ernest Tang Onn Sheng	06-Jun-2015	Malaysia	Selangor	Kota Kemuning area	2.99251	101.541	22
Count_173	Lycaenidae	Chilades	Chilades pandava		lee see mun	06-Jun-2015	Malaysia	Negeri Sembilan	City park, seremban 2	2.68758	101.913	75
Count_211	Lycaenidae	Chilades	Chilades pandava		Narong Jaturas	30-Jun-2015	Malaysia	Federal Territory of Kuala Lumpur	University of Malaya	3.1217	101.653	40
Count_43	Lycaenidae	Chilades	Chilades pandava	Lycaenidae	Gerald Lee Zheng Yang	06-Jun-2015	Malaysia	Selangor	Bandar Sungai Long	3.0418	101.793	62
Count_44	Lycaenidae	Chilades	Chilades pandava	Lycaenidae	Gerald Lee Zheng Yang	06-Jun-2015	Malaysia	Selangor	Bandar Sungai Long	3.0418	101.793	62
Count_50	Lycaenidae	Chilades	Chilades pandava	Lycaenidae	TEO YEW GUAN	06-Jun-2015	Malaysia	Johor	CHINESE HIGH SCHOOL BATU PAHAT	1.83476	102.948	18
Count_72	Nymphalidae	Danaus	Danaus chrysippus	Nymphalidae	MUNA NAJIHAH BINTI HJ. MOKHTARRUDDIN	06-Jun-2015	Malaysia	Federal Territory of Kuala Lumpur	KK12 Lake side	3.12568	101.661	37
Count_151	Nymphalidae	Danaus	Danaus melanippus		Huwa Yean Yin	06-Jun-2015	Malaysia	Malacca	Hutan rekreasi Ayer Keroh	2.2807	102.301	58
Count_119	Pieridae	Delias	Delias hyparete		Gan Hui Hui	06-Jun-2015	Malaysia	Negeri Sembilan	2687, Taman SEA, 70100 Seremban	2.6933	101.955	76
Count_121	Pieridae	Delias	Delias hyparete		Gan Hui Hui	06-Jun-2015	Malaysia	Negeri Sembilan	2687, Taman SEA, 70100 Seremban	2.6933	101.955	76
Count_122	Pieridae	Delias	Delias hyparete		Gan Hui Hui	06-Jun-2015	Malaysia	Negeri Sembilan	2687, Taman SEA, 70100 Seremban	2.6933	101.955	76
Count_157	Pieridae	Delias	Delias hyparete		Huwa Yean Yin	06-Jun-2015	Malaysia	Malacca	Hutan rekreasi Ayer Keroh	2.2807	102.301	58
Count_19	Pieridae	Delias	Delias hyparete	Pieridae	Yu Cheng Swan	06-Jun-2015	Malaysia	Perak	Taman Suria Ipoh	4.63766	101.085	46
Count_22	Pieridae	Delias	Delias hyparete	Pieridae	Yu Cheng Swan	06-Jun-2015	Malaysia	Perak	Taman Suria Ipoh	4.63766	101.085	46
Count_24	Pieridae	Delias	Delias hyparete	Papilionidae	Yu Cheng Swan	06-Jun-2015	Malaysia	Perak	Taman Suria Ipoh	4.63766	101.085	46
Count_4	Pieridae	Delias	Delias hyparete	Nymphalidae	CHAI SHUT KEE	06-Jun-2015	Malaysia	Johor	Kg Baru Senai	1.60107	103.643	23
Count_60	Pieridae	Delias	Delias hyparete	Pieridae	MUNA NAJIHAH BINTI HJ. MOKHTARRUDDIN	06-Jun-2015	Malaysia	Federal Territory of Kuala Lumpur	KK12 Lake side	3.12568	101.661	37
Count_69	Pieridae	Delias	Delias hyparete	Pieridae	MUNA NAJIHAH BINTI HJ. MOKHTARRUDDIN	06-Jun-2015	Malaysia	Federal Territory of Kuala Lumpur	KK12 Lake side	3.12568	101.661	37
Count_109	Nymphalidae	Elymnias	Elymnias hypermnestra	Papilionidae	Lee Jin Ming	06-Jun-2015	Malaysia	Selangor	Sri gombak	3.23776	101.698	67
Count_21	Nymphalidae	Elymnias	Elymnias hypermnestra	Nymphalidae	Yu Cheng Swan	06-Jun-2015	Malaysia	Perak	Taman Suria Ipoh	4.63766	101.085	46
Count_39	Nymphalidae	Elymnias	Elymnias hypermnestra	Nymphalidae	Julie Khoo	06-Jun-2015	Malaysia	Pinang	Bukit Jambul Lakeside	5.34616	100.276	69
Count_11	Pieridae	Eurema	Eurema hecabe	Pieridae	Ng Zhi Yu	06-Jun-2015	Malaysia	Johor	kulai,indahpura	1.64402	103.606	39
Count_167	Pieridae	Eurema	Eurema hecabe		Leong sum yee	06-Jun-2015	Malaysia	Selangor	bandar bukit puchong 2	2.97665	101.623	43
Count_27	Pieridae	Eurema	Eurema hecabe	Lycaenidae	Nurzuhaila binti Jamaludin	06-Jun-2015	Malaysia	Selangor	No 32, Jalan 3/58, Seksyen 3, Bandar Baru Bangi 43650 Selangor	2.93932	101.778	29
Count_52	Pieridae	Eurema	Eurema hecabe	Lycaenidae	TEO YEW GUAN	06-Jun-2015	Malaysia	Johor	CHINESE HIGH SCHOOL BATU PAHAT	1.83476	102.948	18
Count_64	Pieridae	Eurema	Eurema hecabe	Pieridae	MUNA NAJIHAH BINTI HJ. MOKHTARRUDDIN	06-Jun-2015	Malaysia	Federal Territory of Kuala Lumpur	KK12 Lake side	3.12568	101.661	37
Count_79	Pieridae	Eurema	Eurema hecabe	Pieridae	Noraina binti Jamal Rashid	06-Jun-2015	Malaysia	Selangor	Teras Jernang	2.92252	101.758	25
Count_88	Pieridae	Eurema	Eurema hecabe		Mr Ong	06-Jun-2015	Malaysia	Federal Territory of Kuala Lumpur	No 16, Jalan Aminuddin Baki, Tmn Tun Dr Ismail, 60000, Federal Territory of Kuala Lumpur.	3.15146	101.618	50
Count_133	Pieridae	Eurema	Eurema sari	MOTH	Joyce Lean	06-Jun-2015	Malaysia	Federal Territory of Kuala Lumpur	TTDI Kiara Park	3.15616	101.626	66
Count_138	Pieridae	Eurema	Eurema sari	MOTH	Joyce Lean	06-Jun-2015	Malaysia	Federal Territory of Kuala Lumpur	TTDI Kiara Park	3.15616	101.626	66
Count_193	Pieridae	Eurema	Eurema sari		KERK KIM LIAN	06-Jun-2015	Malaysia	Malacca	Hutan rekreasi Ayer Keroh	2.2807	102.301	58
Count_38	Pieridae	Eurema	Eurema sari	Pieridae	Julie Khoo	06-Jun-2015	Malaysia	Pinang	Bukit Jambul Lakeside	5.34616	100.276	69
Count_137	Pieridae	Gandaca	Gandaca harina	MOTH	Joyce Lean	06-Jun-2015	Malaysia	Federal Territory of Kuala Lumpur	TTDI Kiara Park	3.15616	101.626	66
Count_41	Nymphalidae	Hypolimnas	Hypolimnas bolina	Nymphalidae	Gerald Lee Zheng Yang	06-Jun-2015	Malaysia	Selangor	Bandar Sungai Long	3.0418	101.793	62
Count_135	Hesperiidae	Iambrix	Iambrix salsala	Nymphalidae	Joyce Lean	06-Jun-2015	Malaysia	Federal Territory of Kuala Lumpur	TTDI Kiara Park	3.15616	101.626	66
Count_169	Hesperiidae	Iambrix	Iambrix salsala	Lycaenidae	Hannah Muhammad Akram	06-Jun-2015	Malaysia	Federal Territory of Kuala Lumpur	Taman Rimba Kiara	3.14043	101.632	59
Count_49	Nymphalidae	Ideopsis	Ideopsis vulgaris	Nymphalidae	TEO YEW GUAN	06-Jun-2015	Malaysia	Johor	CHINESE HIGH SCHOOL BATU PAHAT	1.83476	102.948	18
Count_107	Nymphalidae	Junonia	Junonia almana	Nymphalidae	Lee Jin Ming	06-Jun-2015	Malaysia	Selangor	Sri gombak	3.23776	101.698	67
Count_108	Nymphalidae	Junonia	Junonia almana	Nymphalidae	Lee Jin Ming	06-Jun-2015	Malaysia	Selangor	Sri gombak	3.23776	101.698	67
Count_110	Nymphalidae	Junonia	Junonia almana	Papilionidae	Lee Jin Ming	06-Jun-2015	Malaysia	Selangor	Sri gombak	3.23776	101.698	67
Count_111	Nymphalidae	Junonia	Junonia almana	Nymphalidae	Lee Jin Ming	06-Jun-2015	Malaysia	Selangor	Sri gombak	3.23776	101.698	67
Count_168	Nymphalidae	Junonia	Junonia almana	Pieridae	Hannah Muhammad Akram	06-Jun-2015	Malaysia	Federal Territory of Kuala Lumpur	Taman Rimba Kiara	3.14043	101.632	59
Count_197	Nymphalidae	Junonia	Junonia almana		NG SAY CHONG	06-Jun-2015	Malaysia	Federal Territory of Kuala Lumpur	Aman Puri	3.21097	101.613	106
Count_216	Nymphalidae	Junonia	Junonia almana		Narong Jaturas	30-Jun-2015	Malaysia	Federal Territory of Kuala Lumpur	University of Malaya	3.1217	101.653	40
Count_70	Nymphalidae	Junonia	Junonia almana	Nymphalidae	MUNA NAJIHAH BINTI HJ. MOKHTARRUDDIN	06-Jun-2015	Malaysia	Federal Territory of Kuala Lumpur	KK12 Lake side	3.12568	101.661	37
Count_85	Nymphalidae	Junonia	Junonia almana		Mr Ong	06-Jun-2015	Malaysia	Federal Territory of Kuala Lumpur	No 16, Jalan Aminuddin Baki, Tmn Tun Dr Ismail, 60000, Federal Territory of Kuala Lumpur.	3.15146	101.618	50
Count_93	Nymphalidae	Junonia	Junonia almana	Nymphalidae	Pang Chee Yee	06-Jun-2015	Malaysia	Federal Territory of Kuala Lumpur	Park of Jalan Midah 3	3.1029	101.732	82
Count_67	Nymphalidae	Junonia	Junonia atlites	Nymphalidae	MUNA NAJIHAH BINTI HJ. MOKHTARRUDDIN	06-Jun-2015	Malaysia	Federal Territory of Kuala Lumpur	KK12 Lake side	3.12568	101.661	37
Count_139	Nymphalidae	Junonia	Junonia orithya		See Sow Pang	06-Jun-2015	Malaysia	Malacca	No 7, Jalan K/P 37, Taman Krubong Perdana, 75260, Melaka.	2.32757	102.244	32
Count_142	Nymphalidae	Junonia	Junonia orithya		See Sow Pang	06-Jun-2015	Malaysia	Malacca	No 7, Jalan K/P 37, Taman Krubong Perdana, 75260, Melaka.	2.32757	102.244	32
Count_146	Nymphalidae	Junonia	Junonia orithya		See Sow Pang	06-Jun-2015	Malaysia	Malacca	No 7, Jalan K/P 37, Taman Krubong Perdana, 75260, Melaka.	2.32757	102.244	32
Count_152	Nymphalidae	Junonia	Junonia orithya		Huwa Yean Yin	06-Jun-2015	Malaysia	Malacca	Hutan rekreasi Ayer Keroh	2.2807	102.301	58
Count_158	Nymphalidae	Junonia	Junonia orithya		Huwa Yean Yin	06-Jun-2015	Malaysia	Malacca	Hutan rekreasi Ayer Keroh	2.2807	102.301	58
Count_165	Nymphalidae	Junonia	Junonia orithya		Leong sum yee	06-Jun-2015	Malaysia	Selangor	bandar bukit puchong 2	2.97665	101.623	43
Count_175	Nymphalidae	Junonia	Junonia orithya		lee see mun	06-Jun-2015	Malaysia	Negeri Sembilan	City park, seremban 2	2.68758	101.913	75
Count_179	Nymphalidae	Junonia	Junonia orithya		lee see mun	06-Jun-2015	Malaysia	Negeri Sembilan	City park, seremban 2	2.68758	101.913	75
Count_181	Nymphalidae	Junonia	Junonia orithya		lee see mun	06-Jun-2015	Malaysia	Negeri Sembilan	City park, seremban 2	2.68758	101.913	75
Count_182	Nymphalidae	Junonia	Junonia orithya		lee see mun	06-Jun-2015	Malaysia	Negeri Sembilan	City park, seremban 2	2.68758	101.913	75
Count_183	Nymphalidae	Junonia	Junonia orithya		innes lee jia hui	06-Jun-2015	Malaysia	Negeri Sembilan	city park	2.68758	101.913	75
Count_187	Nymphalidae	Junonia	Junonia orithya		innes lee jia hui	06-Jun-2015	Malaysia	Negeri Sembilan	city park	2.68758	101.913	75
Count_188	Nymphalidae	Junonia	Junonia orithya		innes lee jia hui	06-Jun-2015	Malaysia	Negeri Sembilan	city park	2.68758	101.913	75
Count_189	Nymphalidae	Junonia	Junonia orithya		innes lee jia hui	06-Jun-2015	Malaysia	Negeri Sembilan	city park	2.68758	101.913	75
Count_190	Nymphalidae	Junonia	Junonia orithya		innes lee jia hui	06-Jun-2015	Malaysia	Negeri Sembilan	city park	2.68758	101.913	75
Count_191	Nymphalidae	Junonia	Junonia orithya		innes lee jia hui	06-Jun-2015	Malaysia	Negeri Sembilan	city park	2.68758	101.913	75
Count_205	Nymphalidae	Junonia	Junonia orithya	Lycaenidae	Lai Yik Chuen	06-Jun-2015	Malaysia	Selangor	Hulu Langat	2.99364	101.789	59
Count_207	Nymphalidae	Junonia	Junonia orithya	Lycaenidae	Lai Yik Chuen	06-Jun-2015	Malaysia	Selangor	Hulu Langat	2.99364	101.789	59
Count_42	Nymphalidae	Junonia	Junonia orithya	Nymphalidae	Gerald Lee Zheng Yang	06-Jun-2015	Malaysia	Selangor	Bandar Sungai Long	3.0418	101.793	62
Count_61	Nymphalidae	Junonia	Junonia orithya	Nymphalidae	MUNA NAJIHAH BINTI HJ. MOKHTARRUDDIN	06-Jun-2015	Malaysia	Federal Territory of Kuala Lumpur	KK12 Lake side	3.12568	101.661	37
Count_68	Nymphalidae	Junonia	Junonia orithya	Nymphalidae	MUNA NAJIHAH BINTI HJ. MOKHTARRUDDIN	06-Jun-2015	Malaysia	Federal Territory of Kuala Lumpur	KK12 Lake side	3.12568	101.661	37
Count_87	Nymphalidae	Junonia	Junonia orithya		Mr Ong	06-Jun-2015	Malaysia	Federal Territory of Kuala Lumpur	No 16, Jalan Aminuddin Baki, Tmn Tun Dr Ismail, 60000, Federal Territory of Kuala Lumpur.	3.15146	101.618	50
Count_91	Nymphalidae	Junonia	Junonia orithya		Mr Ong	06-Jun-2015	Malaysia	Federal Territory of Kuala Lumpur	No 16, Jalan Aminuddin Baki, Tmn Tun Dr Ismail, 60000, Federal Territory of Kuala Lumpur.	3.15146	101.618	50
Count_170	Pieridae	Leptosia	Leptosia nina	Nymphalidae	Hannah Muhammad Akram	06-Jun-2015	Malaysia	Federal Territory of Kuala Lumpur	Taman Rimba Kiara	3.14043	101.632	59
Count_171	Pieridae	Leptosia	Leptosia nina	Nymphalidae	Hannah Muhammad Akram	06-Jun-2015	Malaysia	Federal Territory of Kuala Lumpur	Taman Rimba Kiara	3.14043	101.632	59
Count_172	Pieridae	Leptosia	Leptosia nina	Pieridae	Hannah Muhammad Akram	06-Jun-2015	Malaysia	Federal Territory of Kuala Lumpur	Taman Rimba Kiara	3.14043	101.632	59
Count_53	Pieridae	Leptosia	Leptosia nina	Lycaenidae	TEO YEW GUAN	06-Jun-2015	Malaysia	Johor	CHINESE HIGH SCHOOL BATU PAHAT	1.83476	102.948	18
Count_55	Pieridae	Leptosia	Leptosia nina	Nymphalidae	TEO YEW GUAN	06-Jun-2015	Malaysia	Johor	CHINESE HIGH SCHOOL BATU PAHAT	1.83476	102.948	18
Count_63	Pieridae	Leptosia	Leptosia nina	Pieridae	MUNA NAJIHAH BINTI HJ. MOKHTARRUDDIN	06-Jun-2015	Malaysia	Federal Territory of Kuala Lumpur	KK12 Lake side	3.12568	101.661	37
Count_54	Lycaenidae	Loxura	Loxura atymnus	Lycaenidae	TEO YEW GUAN	06-Jun-2015	Malaysia	Johor	CHINESE HIGH SCHOOL BATU PAHAT	1.83476	102.948	18
Count_29	Nymphalidae	Mycalesis	Mycalesis mineus	Lycaenidae	Nurzuhaila binti Jamaludin	06-Jun-2015	Malaysia	Selangor	No 32, Jalan 3/58, Seksyen 3, Bandar Baru Bangi 43650 Selangor	2.93932	101.778	29
Count_31	Nymphalidae	Mycalesis	Mycalesis mineus	MOTH	Nurzuhaila binti Jamaludin	06-Jun-2015	Malaysia	Selangor	No 32, Jalan 3/58, Seksyen 3, Bandar Baru Bangi 43650 Selangor	2.93932	101.778	29
Count_56	Nymphalidae	Mycalesis	Mycalesis mineus	Pieridae	TEO YEW GUAN	06-Jun-2015	Malaysia	Johor	CHINESE HIGH SCHOOL BATU PAHAT	1.83476	102.948	18
Count_96	Nymphalidae	Neptis	Neptis clinia	Nymphalidae	Pang Chee Yee	06-Jun-2015	Malaysia	Federal Territory of Kuala Lumpur	Park of Jalan Midah 6	3.1029	101.732	82
Count_147	Nymphalidae	Neptis	Neptis hylas		See Sow Pang	06-Jun-2015	Malaysia	Malacca	No 7, Jalan K/P 37, Taman Krubong Perdana, 75260, Melaka.	2.32757	102.244	32
Count_32	Nymphalidae	Neptis	Neptis hylas	Lycaenidae	Nurzuhaila binti Jamaludin	06-Jun-2015	Malaysia	Selangor	No 32, Jalan 3/58, Seksyen 3, Bandar Baru Bangi 43650 Selangor	2.93932	101.778	29
Count_51	Nymphalidae	Neptis	Neptis hylas	Nymphalidae	TEO YEW GUAN	06-Jun-2015	Malaysia	Johor	CHINESE HIGH SCHOOL BATU PAHAT	1.83476	102.948	18
Count_145	Papilionidae	Papilio	Papilio demoleus		See Sow Pang	06-Jun-2015	Malaysia	Malacca	No 7, Jalan K/P 37, Taman Krubong Perdana, 75260, Melaka.	2.32757	102.244	32
Count_149	Papilionidae	Papilio	Papilio demoleus		Huwa Yean Yin	06-Jun-2015	Malaysia	Malacca	Hutan rekreasi Ayer Keroh	2.2807	102.301	58
Count_2	Papilionidae	Papilio	Papilio demoleus	Nymphalidae	Ernest Tang Onn Sheng	06-Jun-2015	Malaysia	Selangor	Kota Kemuning area	2.99251	101.541	22
Count_40	Papilionidae	Papilio	Papilio demoleus	Nymphalidae	Eddie Tang Gwo Huei	06-Jun-2015	Malaysia	Selangor	Kota Kemuning	2.99251	101.541	22
Count_81	Papilionidae	Papilio	Papilio demoleus	Papilionidae	Noraina binti Jamal Rashid	06-Jun-2015	Malaysia	Selangor	Teras Jernang	2.92252	101.758	25
Count_8	Papilionidae	Papilio	Papilio polytes	Papilionidae	CHAI SHUT KEE	06-Jun-2015	Malaysia	Johor	Kg Baru Senai	1.60107	103.643	23
Count_112	Hesperiidae	Pelopidas	Pelopidas mathias	Nymphalidae	Lee Jin Ming	06-Jun-2015	Malaysia	Selangor	Sri gombak	3.23776	101.698	67
Count_84	Nymphalidae	Phalanta	Phalanta phalantha		Mr Ong	06-Jun-2015	Malaysia	Federal Territory of Kuala Lumpur	No 16, Jalan Aminuddin Baki, Tmn Tun Dr Ismail, 60000, Federal Territory of Kuala Lumpur.	3.15146	101.618	50
Count_134	Pieridae	Phrissura	Phrissura aegis	Nymphalidae	Joyce Lean	06-Jun-2015	Malaysia	Federal Territory of Kuala Lumpur	TTDI Kiara Park	3.15616	101.626	66
Count_10	Pieridae	Pieris	Pieris canidia	Pieridae	Ng Zhi Yu	06-Jun-2015	Malaysia	Johor	kulai,indahpura	1.64402	103.606	39
Count_13	Pieridae	Pieris	Pieris canidia	Pieridae	Ng Zhi Yu	06-Jun-2015	Malaysia	Johor	kulai,indahpura	1.64402	103.606	39
Count_14	Pieridae	Pieris	Pieris canidia	Pieridae	Ng Zhi Yu	06-Jun-2015	Malaysia	Johor	kulai,indahpura	1.64402	103.606	39
Count_15	Pieridae	Pieris	Pieris canidia	Pieridae	Ng Zhi Yu	06-Jun-2015	Malaysia	Johor	kulai,indahpura	1.64402	103.606	39
Count_5	Pieridae	Pieris	Pieris canidia	Pieridae	CHAI SHUT KEE	06-Jun-2015	Malaysia	Johor	Kg Baru Senai	1.60107	103.643	23
Count_6	Pieridae	Pieris	Pieris canidia	Pieridae	CHAI SHUT KEE	06-Jun-2015	Malaysia	Johor	Kg Baru Senai	1.60107	103.643	23
Count_212	Lycaenidae	Pseudozizeeria	Pseudozizeeria maha		Narong Jaturas	30-Jun-2015	Malaysia	Federal Territory of Kuala Lumpur	University of Malaya	3.1217	101.653	40
Count_74	Lycaenidae	Pseudozizeeria	Pseudozizeeria maha	Lycaenidae	Noraina binti Jamal Rashid	06-Jun-2015	Malaysia	Selangor	Teras Jernang	2.92252	101.758	25
Count_58	Lycaenidae	Rapala	Rapala manea	Lycaenidae	TEO YEW GUAN	06-Jun-2015	Malaysia	Johor	CHINESE HIGH SCHOOL BATU PAHAT	1.83476	102.948	18
Count_65	Hesperiidae	Suastus	Suastus gremius	Hesperiidae	MUNA NAJIHAH BINTI HJ. MOKHTARRUDDIN	06-Jun-2015	Malaysia	Federal Territory of Kuala Lumpur	KK12 Lake side	3.12568	101.661	37
Count_78	Hesperiidae	Suastus	Suastus gremius		Noraina binti Jamal Rashid	06-Jun-2015	Malaysia	Selangor	Teras Jernang	2.92252	101.758	25
Count_105	Nymphalidae	Ypthima	Ypthima baldus	MOTH	Lee Jin Ming	06-Jun-2015	Malaysia	Selangor	Sri gombak	3.23776	101.698	67
Count_106	Nymphalidae	Ypthima	Ypthima baldus	MOTH	Lee Jin Ming	06-Jun-2015	Malaysia	Selangor	Sri gombak	3.23776	101.698	67
Count_129	Nymphalidae	Ypthima	Ypthima baldus	MOTH	Joyce Lean	06-Jun-2015	Malaysia	Federal Territory of Kuala Lumpur	TTDI Kiara Park	3.15616	101.626	66
Count_132	Nymphalidae	Ypthima	Ypthima baldus	MOTH	Joyce Lean	06-Jun-2015	Malaysia	Federal Territory of Kuala Lumpur	TTDI Kiara Park	3.15616	101.626	66
Count_136	Nymphalidae	Ypthima	Ypthima baldus	MOTH	Joyce Lean	06-Jun-2015	Malaysia	Federal Territory of Kuala Lumpur	TTDI Kiara Park	3.15616	101.626	66
Count_18	Nymphalidae	Ypthima	Ypthima baldus	Nymphalidae	Yu Cheng Swan	06-Jun-2015	Malaysia	Perak	Taman Suria Ipoh	4.63766	101.085	46
Count_214	Nymphalidae	Ypthima	Ypthima baldus		Narong Jaturas	30-Jun-2015	Malaysia	Federal Territory of Kuala Lumpur	University of Malaya	3.1217	101.653	40
Count_215	Nymphalidae	Ypthima	Ypthima baldus		Narong Jaturas	30-Jun-2015	Malaysia	Federal Territory of Kuala Lumpur	University of Malaya	3.1217	101.653	40
Count_94	Nymphalidae	Ypthima	Ypthima baldus	Lycaenidae	Pang Chee Yee	06-Jun-2015	Malaysia	Federal Territory of Kuala Lumpur	Park of Jalan Midah 4	3.1029	101.732	82
Count_95	Nymphalidae	Ypthima	Ypthima baldus	Lycaenidae	Pang Chee Yee	06-Jun-2015	Malaysia	Federal Territory of Kuala Lumpur	Park of Jalan Midah 5	3.1029	101.732	82
Count_97	Nymphalidae	Ypthima	Ypthima baldus	Lycaenidae	Pang Chee Yee	06-Jun-2015	Malaysia	Federal Territory of Kuala Lumpur	Park of Jalan Midah 7	3.1029	101.732	82
Count_101	Nymphalidae	Ypthima	Ypthima huebneri	Nymphalidae	soo said chyn	06-Jun-2015	Malaysia	Johor	Kg Baru Senai	1.60107	103.643	23
Count_16	Nymphalidae	Ypthima	Ypthima huebneri	Nymphalidae	Yu Cheng Swan	06-Jun-2015	Malaysia	Perak	Taman Suria Ipoh	4.63766	101.085	46
Count_162	Nymphalidae	Ypthima	Ypthima huebneri		Leong sum yee	06-Jun-2015	Malaysia	Selangor	bandar bukit puchong 2	2.97665	101.623	43
Count_209	Nymphalidae	Ypthima	Ypthima huebneri	Pieridae	Lai Yik Chuen	06-Jun-2015	Malaysia	Selangor	Hulu Langat	2.99364	101.789	59
Count_210	Nymphalidae	Ypthima	Ypthima huebneri		Narong Jaturas	30-Jun-2015	Malaysia	Federal Territory of Kuala Lumpur	University of Malaya	3.1217	101.653	40
Count_218	Nymphalidae	Ypthima	Ypthima huebneri		MA BAO YI	06-Jun-2015	Malaysia	Negeri Sembilan	Lake Garden Seremban	2.72168	101.944	67
Count_219	Nymphalidae	Ypthima	Ypthima huebneri		MA BAO YI	06-Jun-2015	Malaysia	Negeri Sembilan	Lake Garden Seremban	2.72168	101.944	67
Count_220	Nymphalidae	Ypthima	Ypthima huebneri		MA BAO YI	06-Jun-2015	Malaysia	Negeri Sembilan	Lake Garden Seremban	2.72168	101.944	67
Count_23	Nymphalidae	Ypthima	Ypthima huebneri	Nymphalidae	Yu Cheng Swan	06-Jun-2015	Malaysia	Perak	Taman Suria Ipoh	4.63766	101.085	46
Count_25	Nymphalidae	Ypthima	Ypthima huebneri	Nymphalidae	Yu Cheng Swan	06-Jun-2015	Malaysia	Perak	Taman Suria Ipoh	4.63766	101.085	46
Count_66	Nymphalidae	Ypthima	Ypthima huebneri	Nymphalidae	MUNA NAJIHAH BINTI HJ. MOKHTARRUDDIN	06-Jun-2015	Malaysia	Federal Territory of Kuala Lumpur	KK12 Lake side	3.12568	101.661	37
Count_75	Nymphalidae	Ypthima	Ypthima huebneri	Nymphalidae	Noraina binti Jamal Rashid	06-Jun-2015	Malaysia	Selangor	Teras Jernang	2.92252	101.758	25
Count_76	Nymphalidae	Ypthima	Ypthima huebneri	Nymphalidae	Noraina binti Jamal Rashid	06-Jun-2015	Malaysia	Selangor	Teras Jernang	2.92252	101.758	25
Count_100	Lycaenidae	Zizina	Zizina labradus	Lycaenidae	soo said chyn	06-Jun-2015	Malaysia	Johor	Kg Baru Senai	1.60107	103.643	23
Count_113	Lycaenidae	Zizina	Zizina labradus		Gan Hui Hui	06-Jun-2015	Malaysia	Negeri Sembilan	2687, Taman SEA, 70100 Seremban	2.6933	101.955	76
Count_114	Lycaenidae	Zizina	Zizina labradus		Gan Hui Hui	06-Jun-2015	Malaysia	Negeri Sembilan	2687, Taman SEA, 70100 Seremban	2.6933	101.955	76
Count_115	Lycaenidae	Zizina	Zizina labradus		Gan Hui Hui	06-Jun-2015	Malaysia	Negeri Sembilan	2687, Taman SEA, 70100 Seremban	2.6933	101.955	76
Count_116	Lycaenidae	Zizina	Zizina labradus		Gan Hui Hui	06-Jun-2015	Malaysia	Negeri Sembilan	2687, Taman SEA, 70100 Seremban	2.6933	101.955	76
Count_117	Lycaenidae	Zizina	Zizina labradus		Gan Hui Hui	06-Jun-2015	Malaysia	Negeri Sembilan	2687, Taman SEA, 70100 Seremban	2.6933	101.955	76
Count_118	Lycaenidae	Zizina	Zizina labradus		Gan Hui Hui	06-Jun-2015	Malaysia	Negeri Sembilan	2687, Taman SEA, 70100 Seremban	2.6933	101.955	76
Count_120	Lycaenidae	Zizina	Zizina labradus		Gan Hui Hui	06-Jun-2015	Malaysia	Negeri Sembilan	2687, Taman SEA, 70100 Seremban	2.6933	101.955	76
Count_159	Lycaenidae	Zizina	Zizina labradus		Leong sum yee	06-Jun-2015	Malaysia	Selangor	bandar bukit puchong 2	2.97665	101.623	43
Count_208	Lycaenidae	Zizina	Zizina labradus	Pieridae	Lai Yik Chuen	06-Jun-2015	Malaysia	Selangor	Hulu Langat	2.99364	101.789	59
Count_35	Lycaenidae	Zizina	Zizina labradus	Lycaenidae	Julie Khoo	06-Jun-2015	Malaysia	Pinang	Bukit Jambul Lakeside	5.34616	100.276	69
Count_7	Lycaenidae	Zizina	Zizina labradus	Lycaenidae	CHAI SHUT KEE	06-Jun-2015	Malaysia	Johor	Kg Baru Senai	1.60107	103.643	23
Count_9	Lycaenidae	Zizina	Zizina labradus	Lycaenidae	CHAI SHUT KEE	06-Jun-2015	Malaysia	Johor	Kg Baru Senai	1.60107	103.643	23
Count_98	Lycaenidae	Zizina	Zizina labradus	Lycaenidae	soo said chyn	06-Jun-2015	Malaysia	Johor	Kg Baru Senai	1.60107	103.643	23
Count_99	Lycaenidae	Zizina	Zizina labradus	Lycaenidae	soo said chyn	06-Jun-2015	Malaysia	Johor	Kg Baru Senai	1.60107	103.643	23
Count_206	Hesperiidae	Taractrocera			Lai Yik Chuen	06-Jun-2015	Malaysia	Selangor	Hulu Langat	2.99364	101.789	59
Count_36	Nymphalidae	Ypthima		Lycaenidae	Julie Khoo	06-Jun-2015	Malaysia	Pinang	Bukit Jambul Lakeside	5.34616	100.276	69
Count_37	Nymphalidae	Ypthima		Nymphalidae	Julie Khoo	06-Jun-2015	Malaysia	Pinang	Bukit Jambul Lakeside	5.34616	100.276	69
